# Supplementary material for: Functional Analysis in Mouse Embryonic Stem Cells Reveals Wild-Type Activity for Three Msh6 Variants Found in Suspected Lynch Syndrome Patients
Source: PubMed Central journal article supplement (PMC3769292; doi:10.1371/journal.pone.0074766), 2013-09-10
Supplement: pone.0074766.s001.pdf [file pone.0074766.s001.pdf]

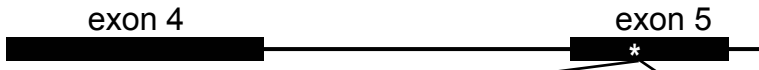

P1085  
 5'- a.cca.gga.gaa.gac.aca.cat.ccc.ttc.tta.gag.ttt.aaa.ggg.tc - 3'  
 ||| ||| ||| ||| ||| ||| ||| ||| ||| ||| ||| ||| ||| |||  
 3'- GGT.CCT.CTT.CTG.TGT.GTA.TCC.AAG.AAT.CTC.AAA.TTT.CCC.A - 5'

R1085

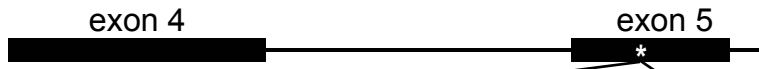

R1093  
 5'- tc.tta.gag.ttt.aaa.ggg.tca.cga.cat.ccc.tgc.att.aca.aag.a - 3'  
 | ||| ||| ||| ||| ||| ||| | ||| ||| ||| ||| ||| |||  
 3'- G.AAT.CTC.AAA.TTT.CCC.AGA.GTG.GTA.GGG.ACG.TAA.TGT.TTC - 5'

H1093

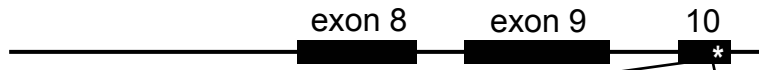

L1352  
 5'-ggg.gaa.gct.atc.cat.agg.ctg.ctg.gcc.ttg.att.aac.gga.ttg - 3'  
 || ||| ||| ||| ||| ||| || ||| ||| ||| ||| ||| ||| |||  
 3'- CA.CTT.CGA.TAG.GTA.TCC.AGA.GTT.CGG.AAC.TAA.TTG.CCT.AA- 5'

Q1352

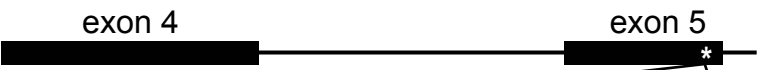

G1137  
 5'- act.gga.cca.aat.atg.ggg.ggc.aag.tct.aca.ctc.ata.a - 3'  
 || ||| ||| ||| ||| ||| || ||| ||| ||| ||| ||| |||  
 3'-GA.CCT.GGT.TTA.TAC.CCC.TCG.TTC.AGA.TGT.GAG.TAT- 5'

S1137
