# Supplementary material for: Functional Analysis in Mouse Embryonic Stem Cells Reveals Wild-Type Activity for Three Msh6 Variants Found in Suspected Lynch Syndrome Patients
Source: PubMed Central journal article supplement (PMC3769292; doi:10.1371/journal.pone.0074766), 2013-09-10

**A**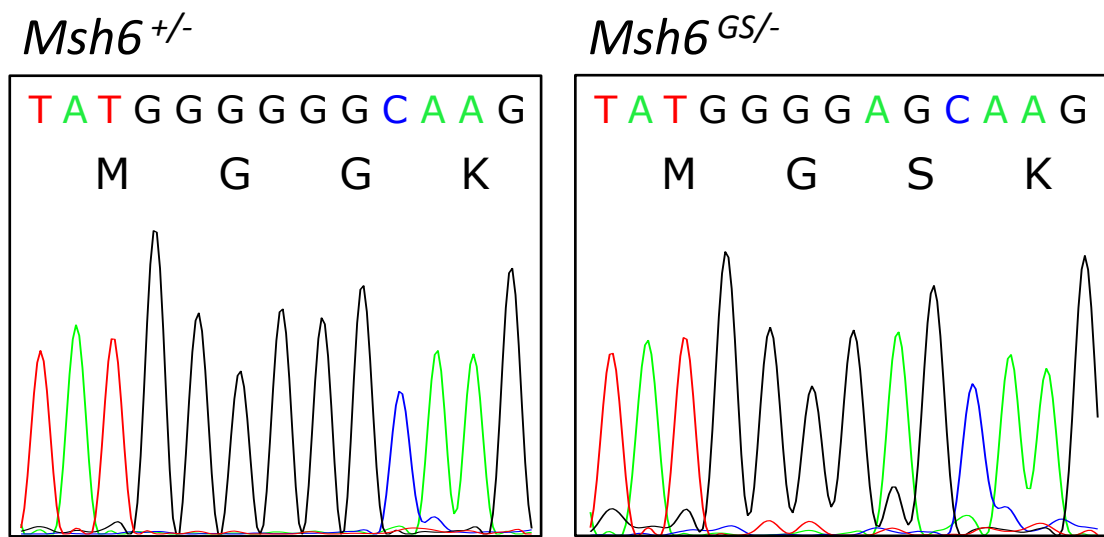**B**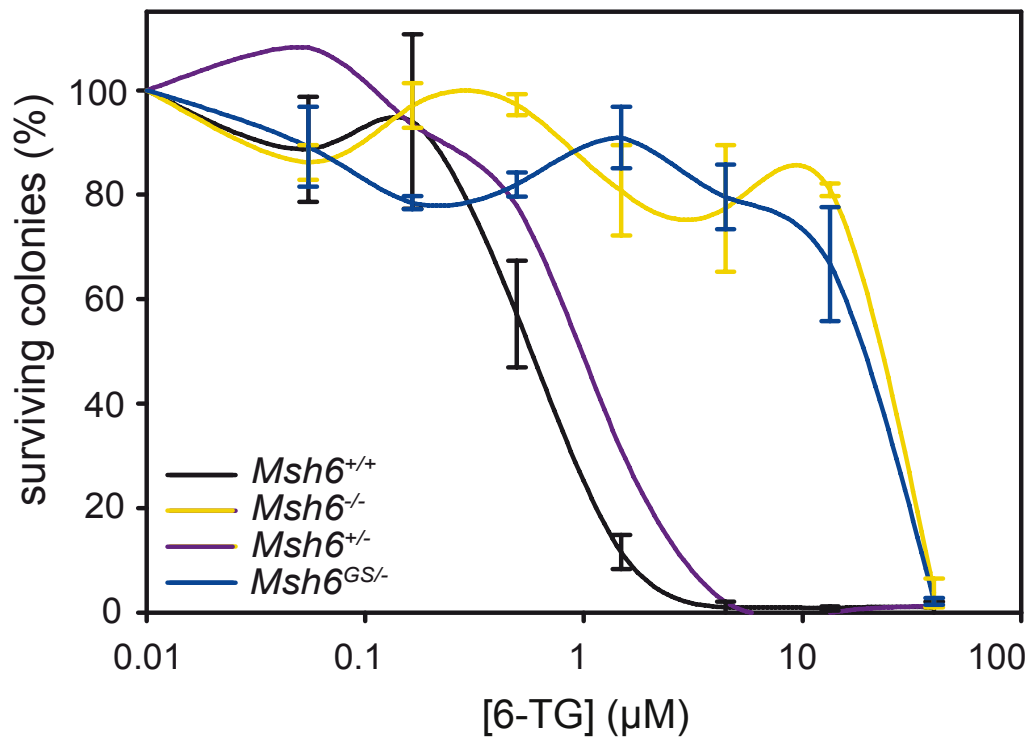

Supplement: pone.0074766.s002.pdf [file pone.0074766.s002.pdf]
